# Supplementary material for: Assessing Health Impacts of Pictorial Health Warning Labels on Cigarette Packs in Korea Using DYNAMO-HIA
Source: PubMed Central journal article supplement — J Prev Med Public Health. 2017 Jun 25;50(4):251–61. doi: 10.3961/jpmph.17.032 (PMC5541276; doi:10.3961/jpmph.17.032), 2017-06-25
Supplement: jpmph-50-4-251-suppl2.pdf [file jpmph-50-4-251-suppl2.pdf]

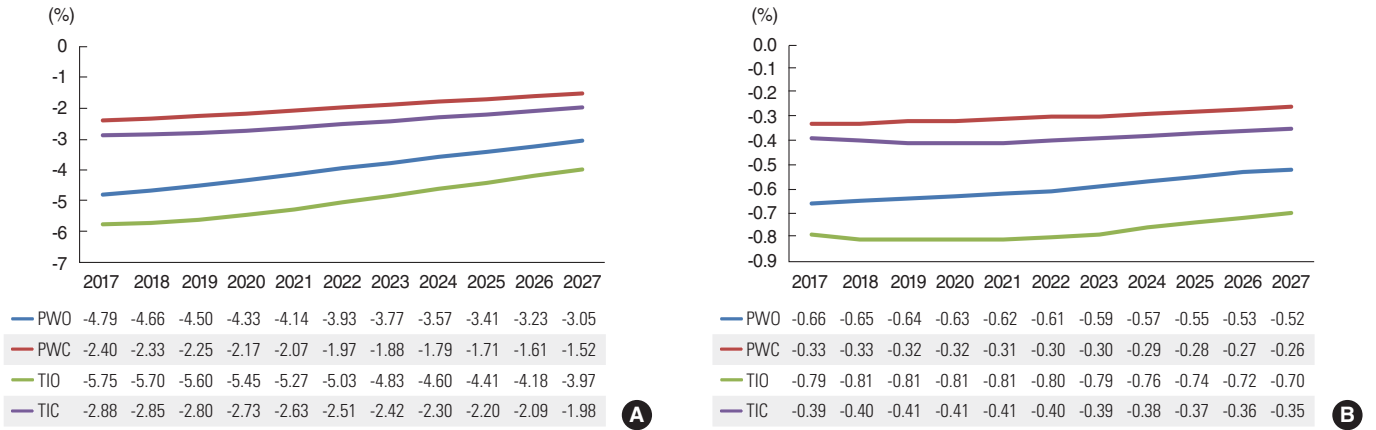

**Supplemental Figure 1.** Differences in smoking rates between the four anti-smoking scenarios and the reference scenario when net transition was assumed (A) males, (B) females. PWO, pictorial Warning, the optimistic scenario; PWC, pictorial warning, the conservative scenario; TIO, tax increase, the optimistic scenario; TIC, tax increase, the conservative scenario.
